# Supplementary material for: First-principles study on the elastic, electronic and optical properties of all-inorganic halide perovskite solid solutions of CsPb(Br1−xClx)3 within the virtual crystal approximation
Source: Royal Society of Chemistry journal article supplement (doi:10.1039/d2ra01084d), 2022-01-01
Supplement: d2ra01084d1.pdf [file d2ra01084d1.pdf]

# Supporting Information – First-principles study on elastic, electronic and optical properties of all-inorganic halide perovskite solid solutions $\text{CsPb}(\text{Br}_{1-x}\text{Cl}_x)_3$ within virtual crystal approximation

Un-Hyok Ko, Jun-Hyok Ri, Jong-Hyok Jang, Chol-Hyok Ri, Un-Gi Jong, Chol-Jun Yu\*

*Chair of Computational Materials Design (CMD), Faculty of Materials Science, Kim Il Sung University,  
Ryongnam-Dong, Taesong District, Pyongyang, PO Box 76, Democratic People's Republic of Korea*

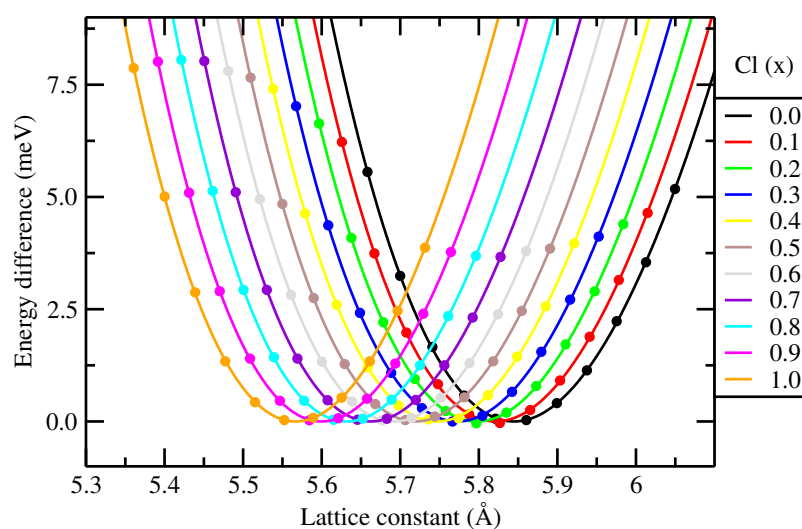

Figure S1. Energy–lattice constant curves obtained by fitting the calculation data into the natural strain equation of state (EOS) for crystalline solid solutions  $\text{CsPb}(\text{Br}_{1-x}\text{Cl}_x)_3$  ( $x = [0, 1]$ , interval 0.1).

\*Corresponding author: Chol-Jun Yu, Email: cj.yu@ryongnamsan.edu.kp

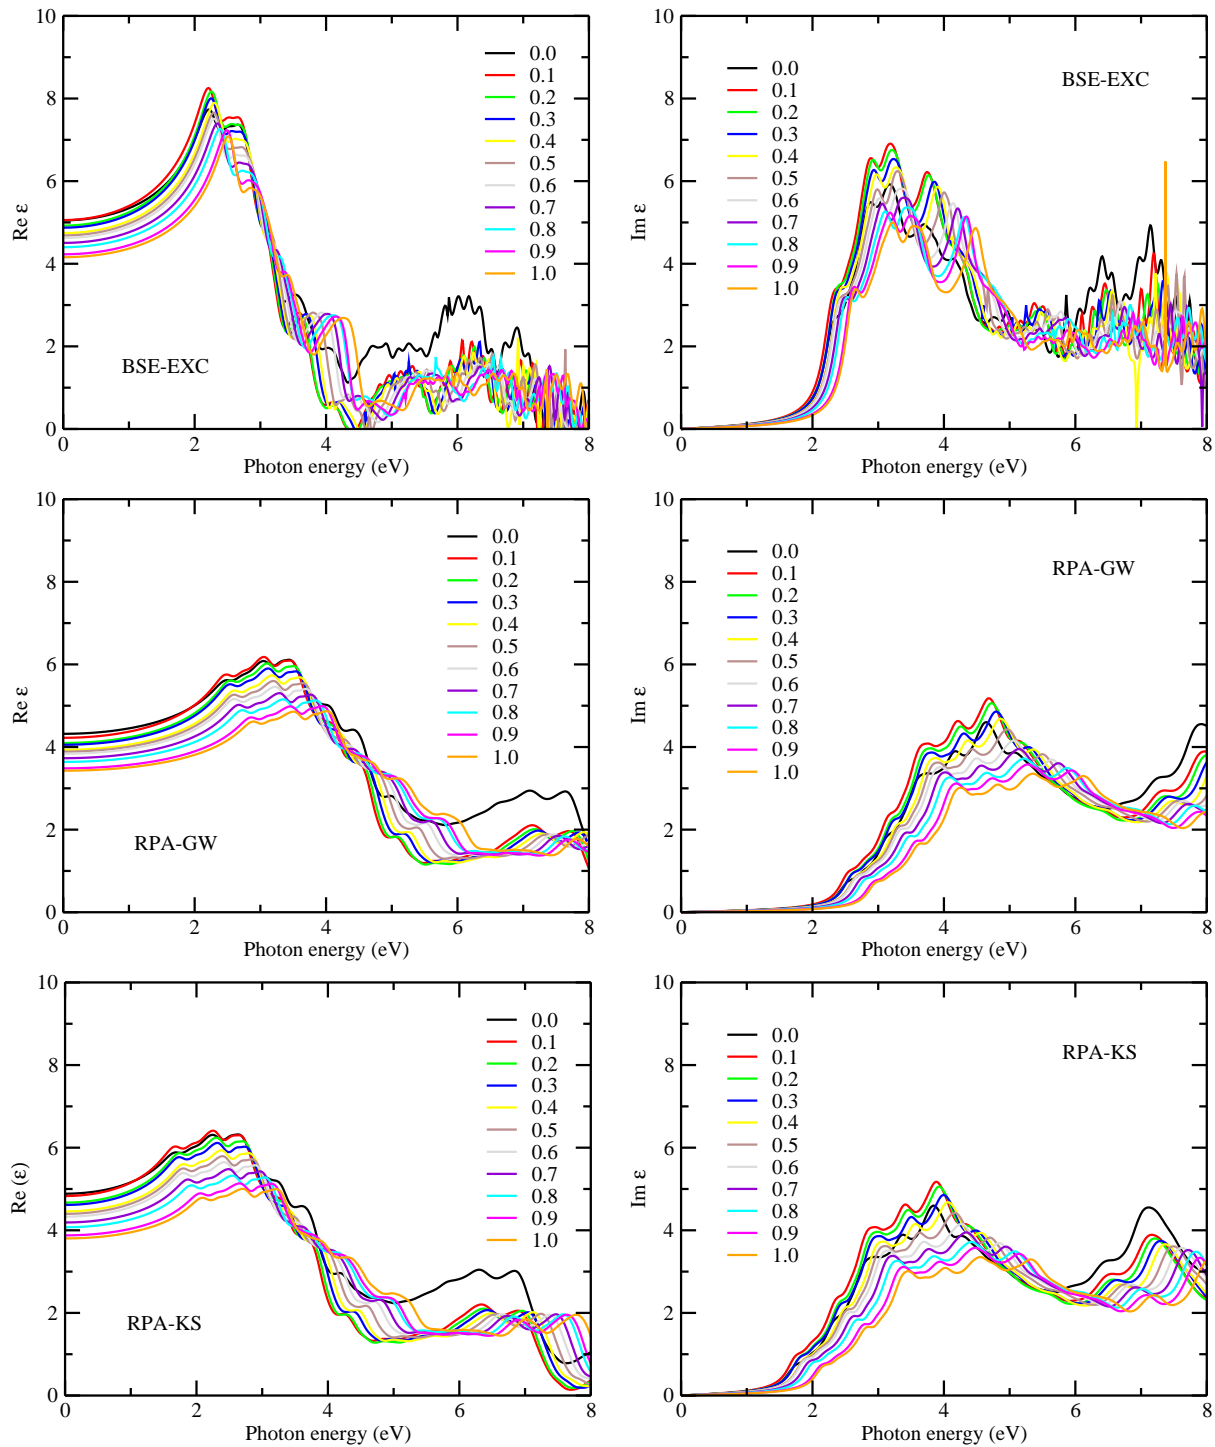

Figure S2. Frequency dependent dielectric constants of  $\text{CsPb}(\text{Br}_{1-x}\text{Cl}_x)_3$  ( $x = [0, 1]$ , interval 0.1), obtained by solving the Bethe-Salpeter equation with excitonic effect (BSE-EXC), GW equation within random phase approximation (RPA-GW) and Kohn-Sham equation with RPA (RPA-KS).

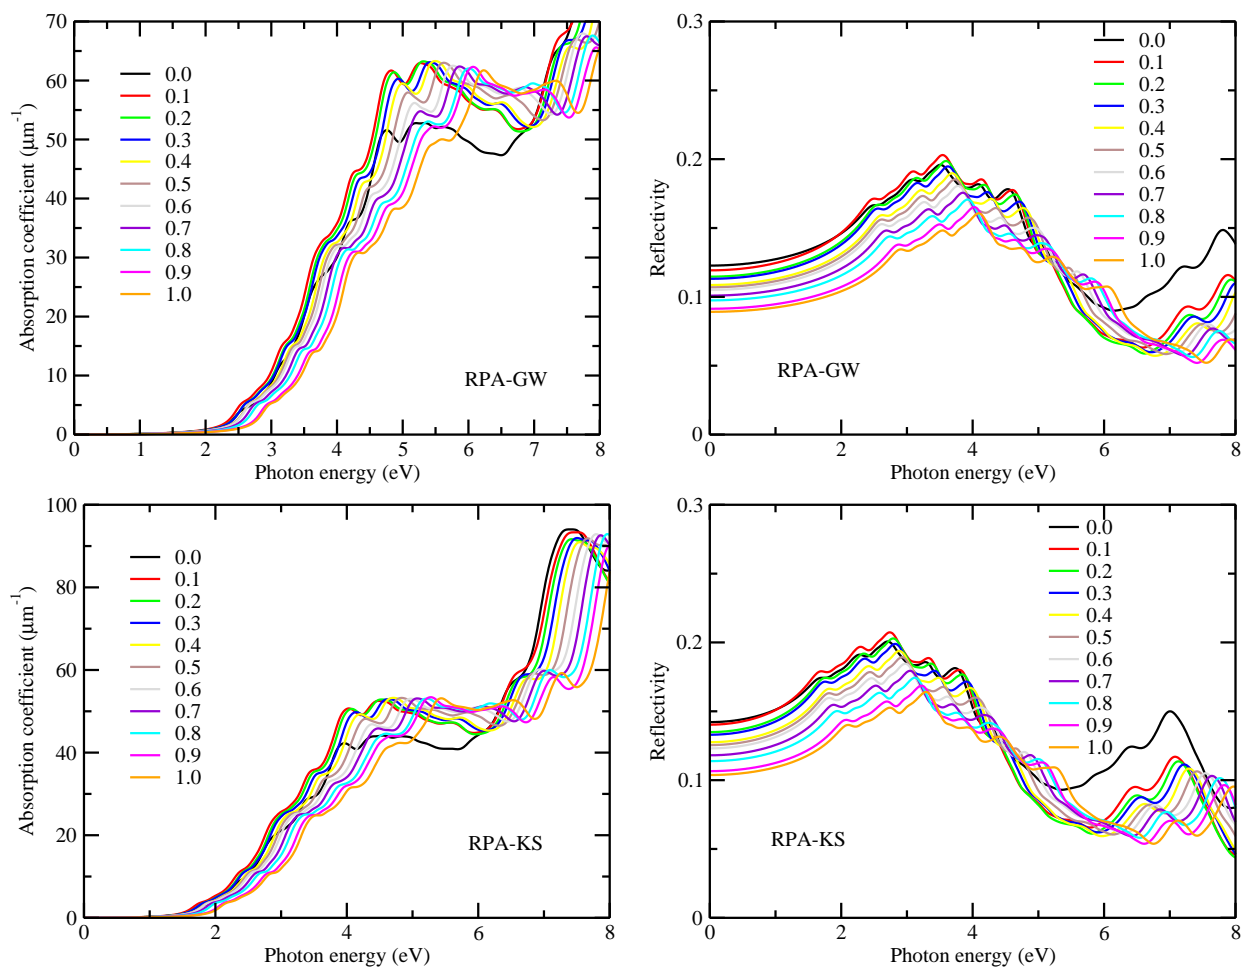

Figure S3. Photo-absorption coefficient (left panel) and reflectivity (right panel) of  $\text{CsPb}(\text{Br}_{1-x}\text{Cl}_x)_3$  as a function of photon energy, obtained by using RPA-GW and RPA-KS approaches.

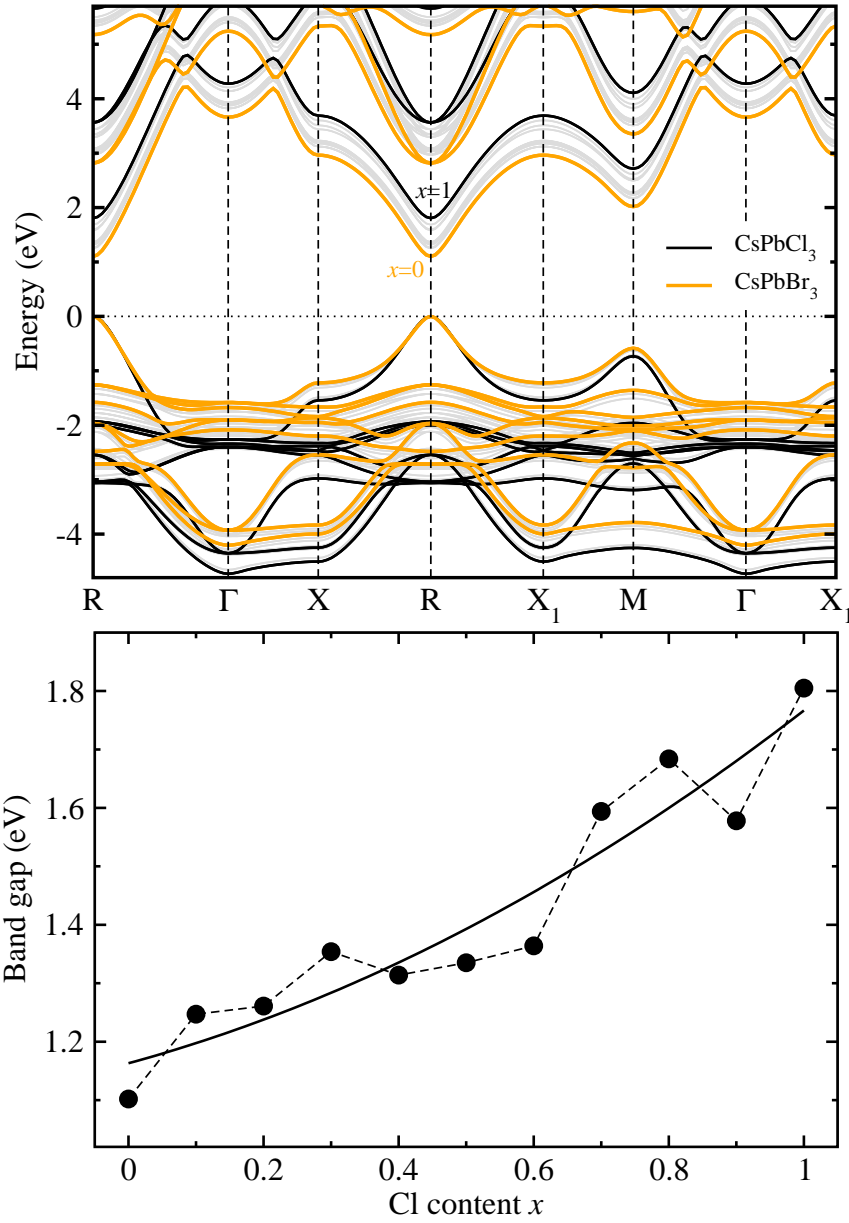

Figure S4. Band structures of cubic CsPbX<sub>3</sub> (X = Br<sub>1-x</sub>Cl<sub>x</sub>) (top) and band gaps (bottom) as increasing the Cl content  $x$  from 0 to 1, calculated with HSE06+SOC method. The band gap increases along the quadratic function of  $E_g(x) = 1.163 + 0.316x + 0.288x^2$  (eV).

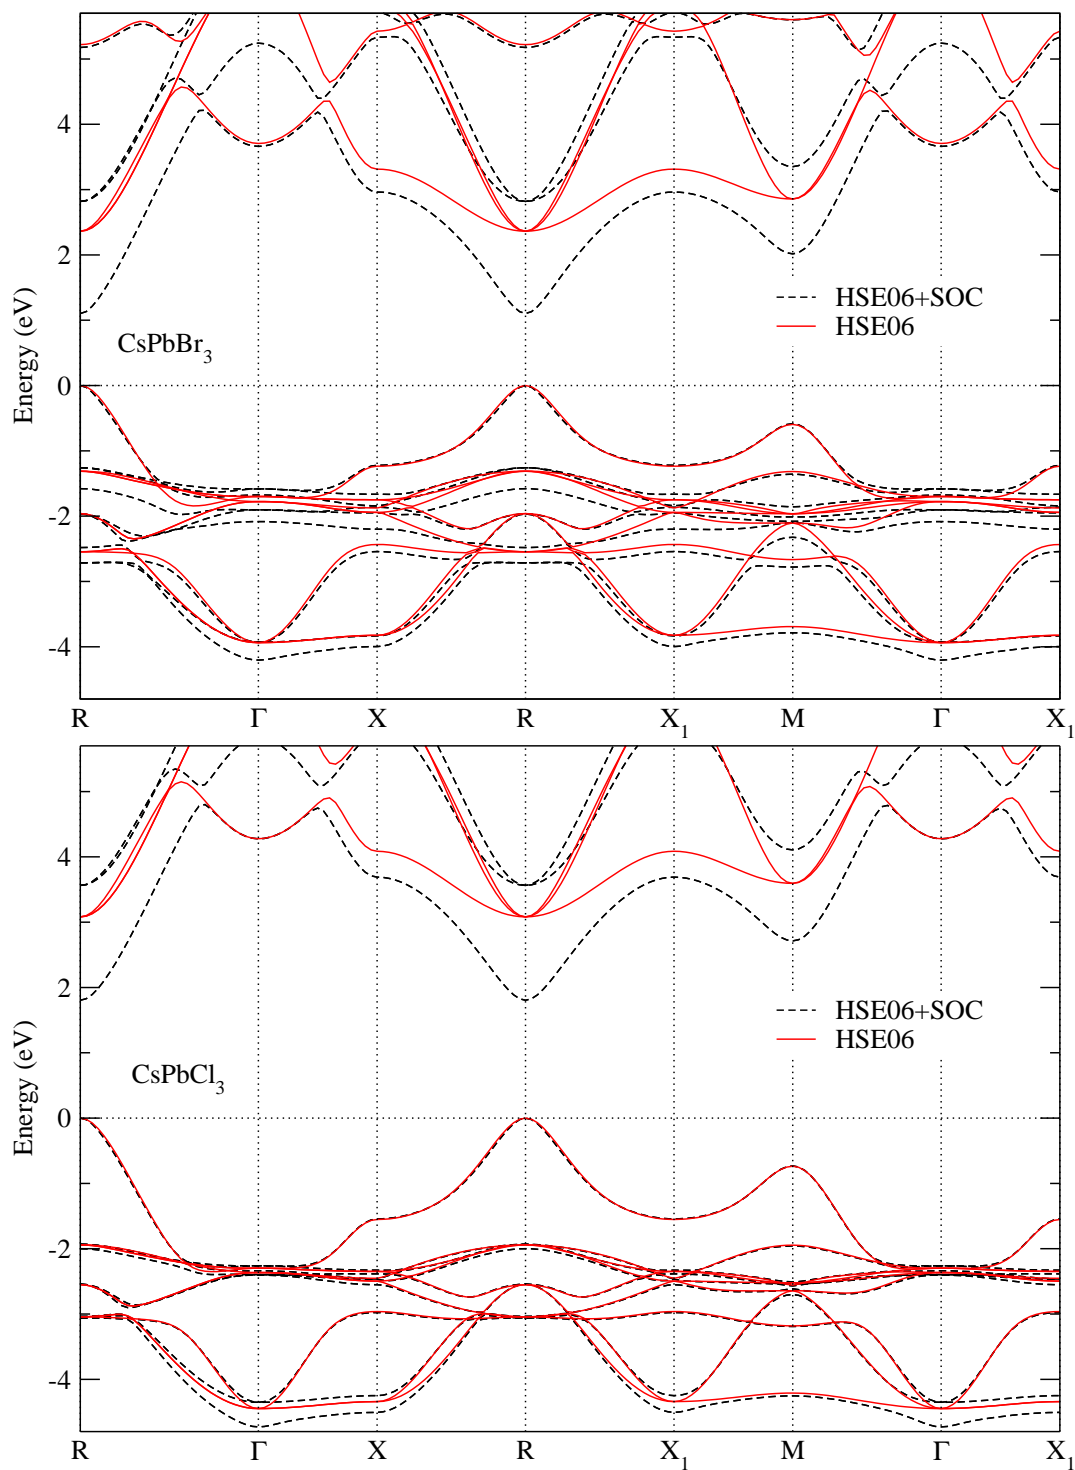

Figure S5. Comparison of band structures calculated with HSE06 (red solid line) and HSE06+SOC (black dashed line) for  $\text{CsPbBr}_3$  (top) and  $\text{CsPbCl}_3$  (bottom).
